# Supplementary material for: Vitamin A Status Modulates Epithelial Mesenchymal Transition in the Lung: The Role of Furin
Source: MDPI journal article supplement (doi:10.3390/nu16081177), 2024-04-15
Supplement: s1 [file s1]

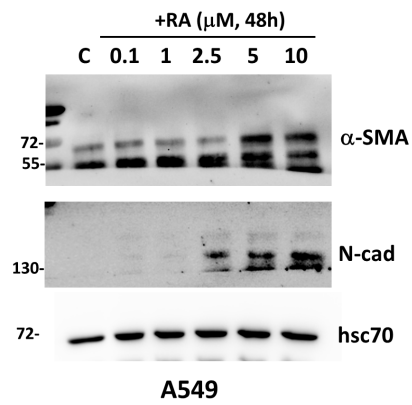

**Supplementary Figure S1.** Effect of RA addition in vitro in A549 human lung cell lines. Western blot analysis showed the expression of the EMT markers  $\alpha$ -SMA and N-cadherin after incubation with increasing concentrations of all-trans RA for 48 h. hcs70 was used as loading control.
